# Supplementary material for: Roles of Alternative RNA Splicing of the Bif-1 Gene by SRRM4 During the Development of Treatment-induced Neuroendocrine Prostate Cancer
Source: PubMed Central journal article supplement — eBioMedicine. 2018 May 16;31:267–75. doi: 10.1016/j.ebiom.2018.05.002 (PMC6013970; doi:10.1016/j.ebiom.2018.05.002), 2018-05-16
Supplement: mmc1.pdf [file mmc1.pdf]

## Supplementary Figures

Supplementary Figure 1

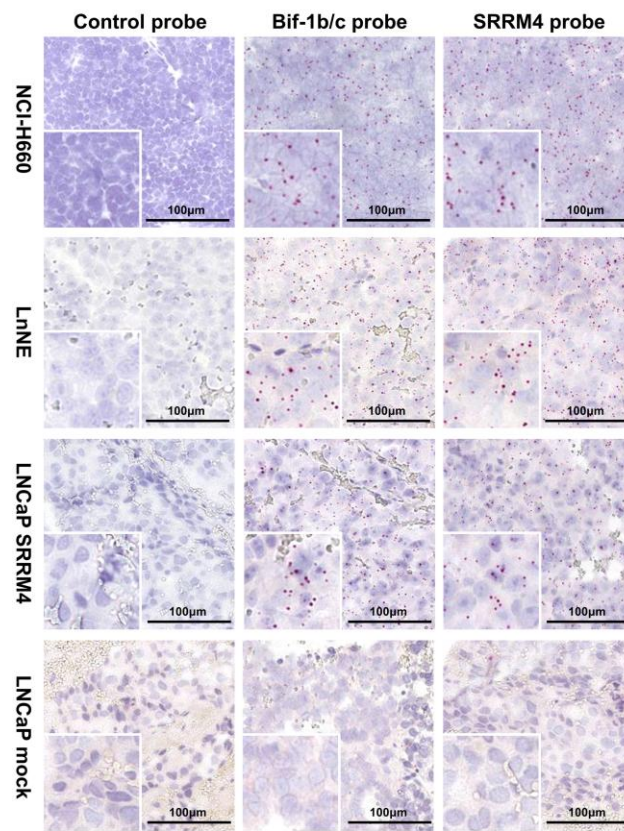

**Figure S1.** Control, neural-specific Bif-1 variants and SRRM4 RISH probes were applied to tissue slides from NEPC (NCI-H660 and LnNE) xenografts and AdPC (LNCaP) xenografts. These assays confirmed the specificity of the RISH probes in detecting Bif-1 and SRRM4 genes.

Supplementary Figure 2

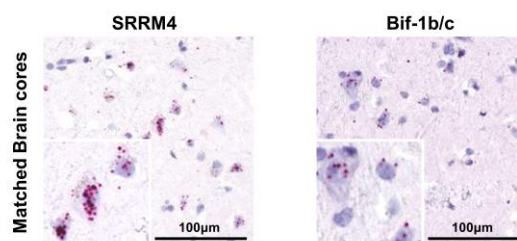

**Figure S2.** RISH assays detect SRRM4 and neural-specific Bif-1 variants in brain tissues.

Supplementary Figure 3

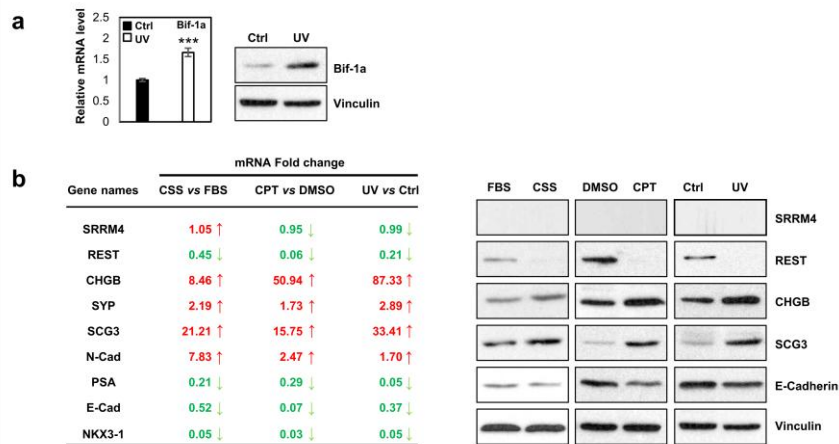

**Figure S3. (a)** LNCaP cells were exposed to ultraviolet light (UV light, 6 mJ/cm<sup>2</sup>). Bif-1a mRNA and protein levels were measured by real-time qPCR and immunoblotting assays.

**(b)** LNCaP cells were treated with charcoal stripped serum, 8μM CPT or UV light irritation (6 mJ/cm<sup>2</sup>). Total RNA was extracted and used to measure mRNA levels of SRRM4, AdPC markers (NKX3.1, PSA, and E-Cad) and NEPC markers (N-Cad, REST, CHGB, SYP and SCG3) by real-time qPCR. SRRM4, REST, CHGB, SCG3, and E-Cad protein levels were measured by immunoblotting.

Supplementary Figure 4

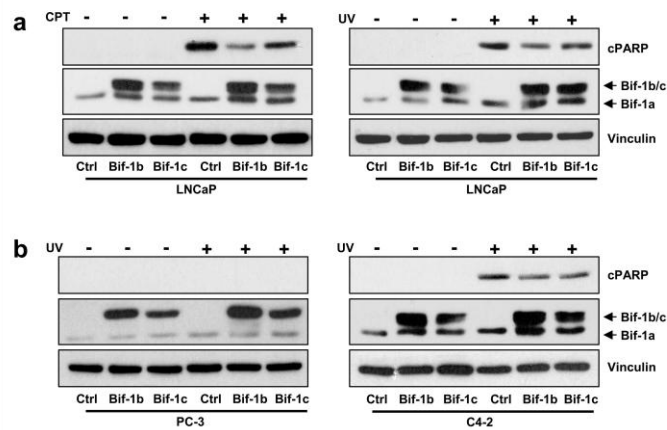

**Figure S4.** LNCaP cell lines were infected by lentivirus encoding control, Bif-1b or Bif-1c. Cells were treated with 8μM CPT for 24 hours or exposed to UV light (6 mJ/cm<sup>2</sup>) in **(a)**. PC-3 and C4-2 cells were infected by lentivirus encoding control, Bif-1b or Bif-1c **(b)**. Cells were exposed to UV light (10 mJ/cm<sup>2</sup> for PC-3, 6 mJ/cm<sup>2</sup> for C4-2). Cleaved PARP, Bif-1 and vinculin protein levels were measured by immunoblotting.

### Supplementary Figure 5

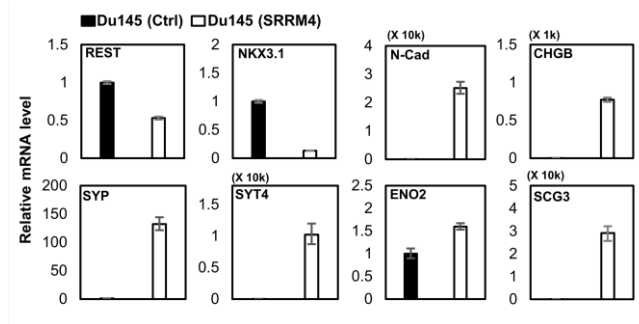

**Figure S5.** Real-time qPCR measured the expression of REST, NKX3.1, N-Cad, CHGB, SYP, SYT4, ENO2 and SCG3 genes in DU145 cells expressing Ctrl or SRRM4.

**Supplementary table 1. Information on primers involved in the study.**

| <b>Gene name</b>     | <b>Sequence (5' - 3')</b> |
|----------------------|---------------------------|
| SRRM4 F              | AGCTCCAAGAAACATAAGCGAC    |
| SRRM4 R              | CCGTCTTTTGCTTTTAGGGCTAC   |
| Bif-1a F             | GCTGCAGAAACTAGAAATTCATCT  |
| Bif-1a R             | CCCAGTTGTTTCTGGAGGTC      |
| Bif-1b F             | AAGAGACTGGATTTGGATGCTG    |
| Bif-1b R             | ACCTCCTCTGCCAAATCATA      |
| Bif-1c F             | TGCATGTAAAATGGCTGAAGAT    |
| Bif-1c R             | CAAAGTCATTCAGACAGCGAAG    |
| GAPDH F              | GGACCTGACCTGCCGTCTAGAA    |
| GAPDH R              | GGTGTGCTGTTGAAGTCAGAG     |
| Bif-1 Regular PCR F  | AAGGCAAAAGCTGCAGAAACTA    |
| Bif-1 Regular PCR R  | TCTGCTTGACGATCAAATTCAC    |
| Bif-1 exon6 CHIP F   | TTTGTTTCACTGTGTTTATTGG    |
| Bif-1 exon6 CHIP R   | TTCAAGGCGAGCTGAGTTTAGT    |
| Bif-1 exon7 CHIP F   | GATTCTGAAAAAGAGTATGCCATT  |
| Bif-1 exon7 CHIP R   | CTCCTCTGCCAAATCTAGC       |
| GAPDH exon7/8 CHIP F | GGCATGGACTGTGGTCATGAG     |
| GAPDH exon7/8 CHIP R | TGCACCACCAACTGCTTAGC      |
| NKX3.1 F             | CCCACACTCAGGTGATCGAG      |
| NKX3.1 R             | GAGCTGCTTTCGCTTAGTCTT     |
| PSA F                | AGTGCGAGAAGCATTCCCAAC     |
| PSA R                | CCAGCAAGATCACGCTTTTGT     |
| E-Cadherin F         | ATTTTTCCCTCGACACCCGAT     |
| E-Cadherin R         | TCCCAGGCGTAGACCAAGA       |
| N-Cadherin F         | TGCGGTACAGTGTAAGTGGG      |
| N-Cadherin R         | GAAACCGGGCTATCTGCTCG      |
| REST F               | GCCGCACCTCAGCTTATTATG     |
| REST R               | CCGGCATCAGTTCTGCCAT       |
| SYP F                | TTAGTTGGGGACTACTCCTCG     |
| SYP R                | GGCCCTTTGTTATTCTCTCGGTA   |
| Chromogranin B F     | CGAGGGGAAGATAGCAGTGAA     |
| Chromogranin B R     | CAGCATGTGTTTCCGATCTGG     |
| SCG3 F               | GTCTTCATCAACTAGACGGGACT   |
| SCG3 R               | ACAATCTTGTCAAACACGGCTC    |
| SYT4 F               | TGACCCGTACATCAAATGACAA    |
| SYT4 R               | GTGGGGATAAGGGATTCCATAGA   |
| ENO2 F               | CCGGGAACCTCAGACCTCATC     |
| ENO2 R               | CTCTGCACCTAGTCGCATGG      |

**Supplementary table 2. Information on antibodies involved in the study.**

| <b>Antibody</b> | <b>Clone ID</b> | <b>Cat No.</b> | <b>Supplier</b>           |
|-----------------|-----------------|----------------|---------------------------|
| Bif-1           | 30A882.1.1      | NBP2-24733     | Novus Biologicals         |
| Vinculin        | hVIN-1          | V9131          | Sigma-Aldrich             |
| NSE             |                 | ab53025        | Abcam                     |
| SYP             |                 | sc-17750       | Santa Cruz                |
| Cleaved PARP    |                 | 9541S          | Cell Signaling Technology |
| Flag            | M5              | F4042          | Sigma-Aldrich             |
| REST            | EPR2436Y        | Ab75785        | Abcam                     |
| Chromogranin B  |                 | sc-1489        | Santa Cruz                |
| SCG3            |                 | sc-1492        | Santa Cruz                |
| E-Cadherin      |                 | 14472          | Cell Signaling Technology |
| AR (N-20)       |                 | sc-816         | Santa Cruze               |
| PSA (C-19)      |                 | sc-7638        | Santa Cruze               |
| SRRM4           |                 | ab112092       | Abcam                     |



|      |   |   |
|------|---|---|
| AdPC | 0 | 0 |
| AdPC | 1 | 1 |
| AdNC | 2 | 1 |
| AdNC | 2 | 1 |
| SCNC | 2 | 2 |
| SCNC | 2 | 2 |
| SCNC | 1 | 1 |
| SCNC | 2 | 2 |
| SCNC | 2 | 2 |
| SCNC | 2 | 2 |
